# Supplementary material for: Neonatal Brains Exhibit Higher Neural Reparative Activities than Adult Brains in a Mouse Model of Ischemic Stroke
Source: MDPI journal article supplement (doi:10.3390/cells13060519), 2024-03-15
Supplement: s1 [file s1]

# Supplementary Figure S1

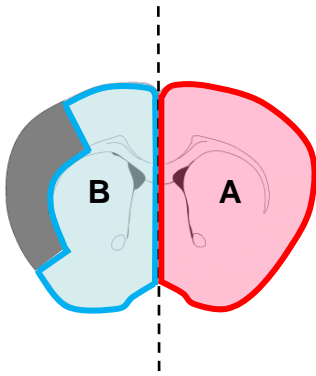

Midline of hemisphere

**Area "A":** Contralateral hemisphere area  
(marked in red and demarcated by a red line)

**Area "B":** Intact area of the infarcted hemisphere  
(marked in blue and demarcated by a blue line)

## Supplementary Figure S2

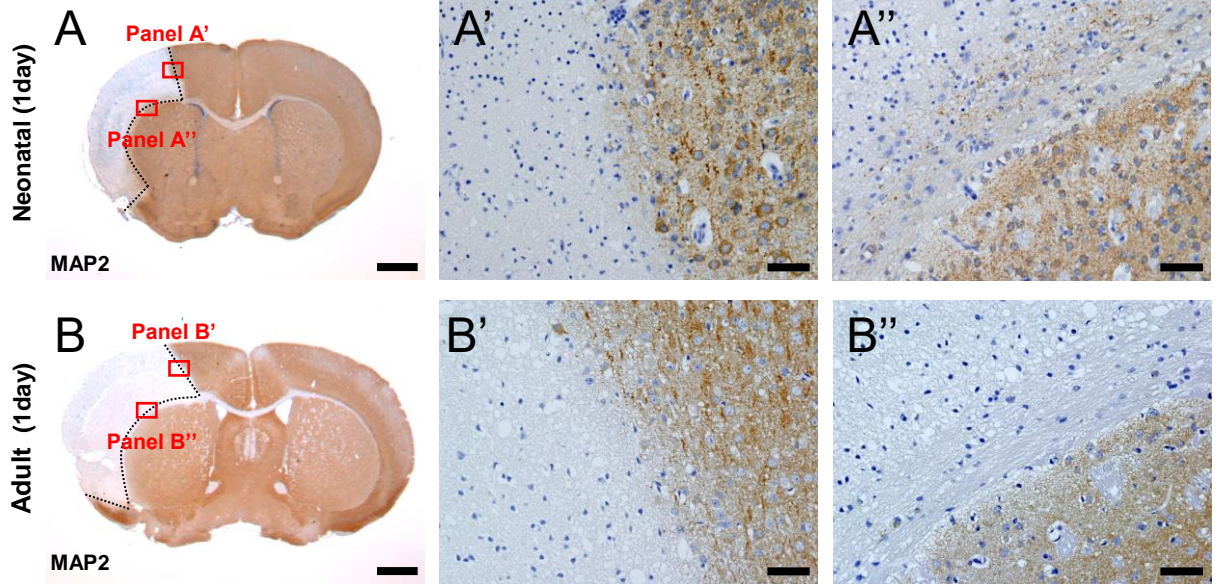

## Supplementary Figure S3

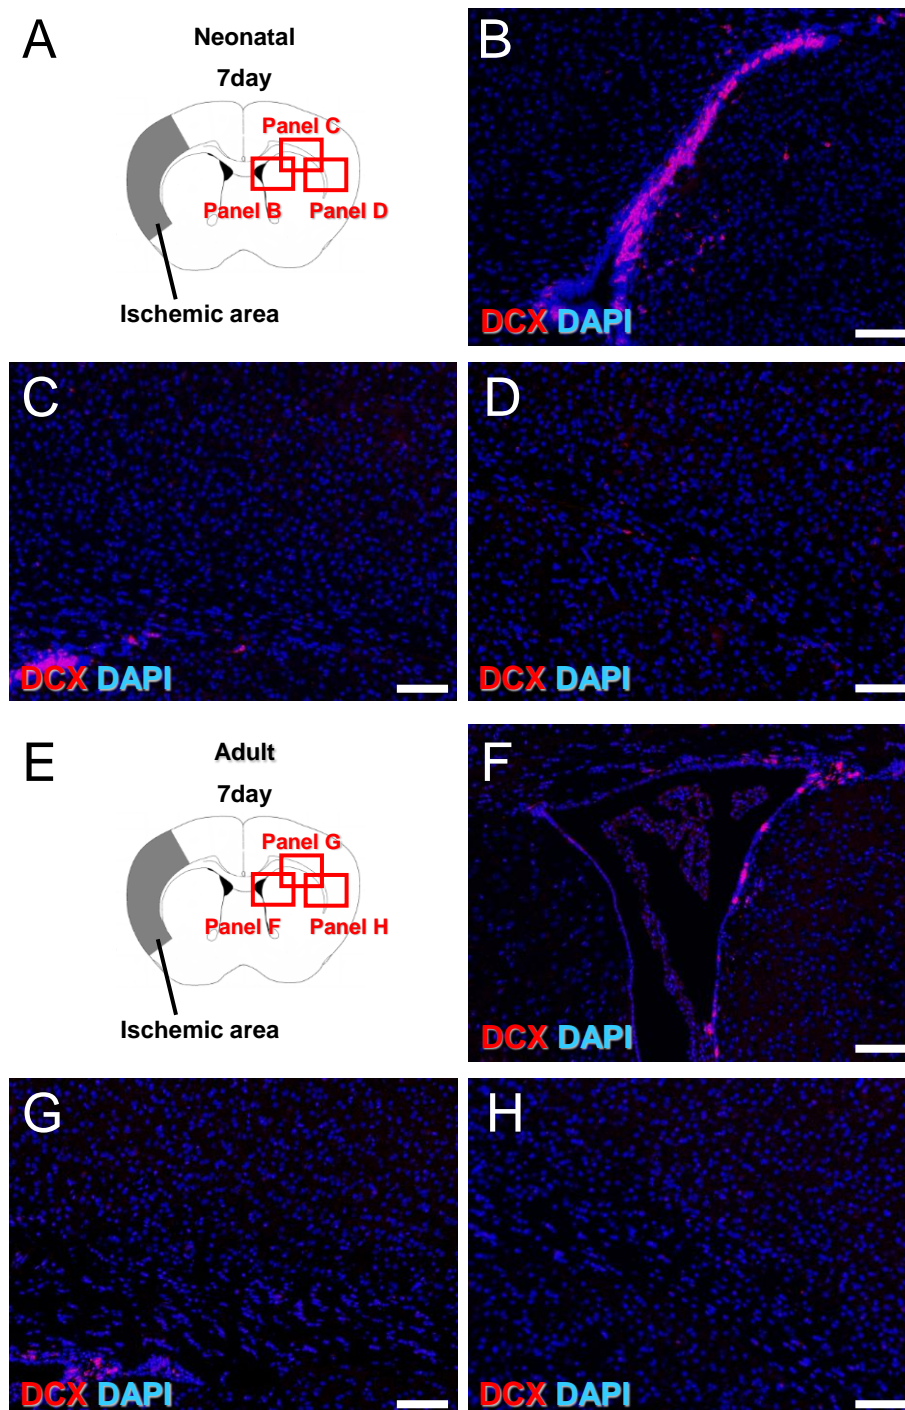

## Supplementary Figure legends

### Figure S1

Schematic representation of the formula for calculating “% ischemic area”. Area “A” represents contralateral hemisphere area (marked in red and demarcated by a red line). Area “B” represents the intact area of the infarcted hemisphere (marked in blue and demarcated by a blue line). % ischemic area = [(contralateral hemisphere area) – (intact area of infarcted hemisphere)]/[(contralateral hemisphere area) × 2] × 100; in other words, % ischemic area =  $[A - B]/[A \times 2] \times 100$ .

### Figure S2

Immunohistochemistry of MAP2 in the brain sections from neonatal (A, A', A'') and adult mice (B, B', B'') on day 1 after MCAO. Scale bars = 1 mm (A, B) and 50  $\mu$ m (A', A'', B', B''). Abbreviations: MAP2, microtubule-associated protein 2; MCAO, middle cerebral artery occlusion.

### Figure S3

Immunohistochemistry of DCX in the contralateral brain sections from neonatal (A–D) and adult mice (E–H) at 7 days after MCAO [DCX (B–D, F–H: red), DAPI (B–D, F–H: blue)]. DCX<sup>+</sup> cells were restricted within the SVZ in neonatal (B) and adult mice (F). Scale bars = 100  $\mu$ m (B–D, F–H). Abbreviations: DAPI, 4',6-diamidino-2-phenylindole; DCX, doublecortin; MCAO, middle cerebral artery occlusion; SVZ, subventricular zone.

## Supplementary Table S1

**The genes included in “GO:0048667: cell morphogenesis involved in neuron differentiation” and the values of fold change (iNSPCs from neonatal mice relative to iNSPCs from adult mice)**

| Gene symbol | Gene name                                                                     | ID           | Fold change |
|-------------|-------------------------------------------------------------------------------|--------------|-------------|
| Cntn1       | contactin 1                                                                   | 1449563_at   | 29.91       |
| Ablim1      | actin-binding LIM protein 1                                                   | 1442376_at   | 26.71       |
| Ank3        | ankyrin 3, epithelial                                                         | 1452872_at   | 23.12       |
| Dcdc2a      | doublecortin domain containing 2a                                             | 1459661_at   | 19.86       |
| Slc1a3      | solute carrier family 1 (glial high affinity glutamate transporter), member 3 | 1440491_at   | 14.54       |
| Lhx3        | LIM homeobox protein 3                                                        | 1425041_at   | 14.47       |
| Megf9       | multiple EGF-like-domains 9                                                   | 1455960_at   | 12.58       |
| Lpar3       | lysophosphatidic acid receptor 3                                              | 1418723_at   | 12.31       |
| Lgi1        | leucine-rich repeat LGI family, member 1                                      | 1435851_at   | 12.13       |
| Elavl4      | ELAV (embryonic lethal, abnormal vision, Drosophila)-like 4 (Hu antigen D)    | 1452894_at   | 12.12       |
| Itgb1       | integrin beta 1 (fibronectin receptor beta)                                   | 1438119_at   | 10.58       |
| Pcdh15      | protocadherin 15                                                              | 1421503_at   | 10.29       |
| Pax6        | paired box 6                                                                  | 1419271_at   | 9.9         |
| Ptprz1      | protein tyrosine phosphatase, receptor type Z, polypeptide 1                  | 1427019_at   | 8.7         |
| Myo5b       | myosin VB                                                                     | 1441104_at   | 8           |
| Cckar       | cholecystokinin A receptor                                                    | 1421195_at   | 7.64        |
| Actl9       | actin-like 9                                                                  | 1437038_x_at | 7.53        |
| Cacna1a     | calcium channel, voltage-dependent, P/Q type, alpha 1A subunit                | 1430408_at   | 7.3         |
| Kalrn       | kalirin, RhoGEF kinase                                                        | 1448023_at   | 7.1         |
| Dscam       | Down syndrome cell adhesion molecule                                          | 1419293_at   | 6.88        |
| Sult4a1     | sulfotransferase family 4A, member 1                                          | 1421606_a_at | 6.87        |
| Epha3       | Eph receptor A3                                                               | 1426057_a_at | 6.52        |
| Dscaml1     | Down syndrome cell adhesion molecule like 1                                   | 1441706_at   | 6.51        |
| Zeb2        | zinc finger E-box binding homeobox 2                                          | 1454200_at   | 6.43        |
| Zdhhc17     | zinc finger, DHHC domain containing 17                                        | 1458363_at   | 6.29        |

|          |                                                                               |              |      |
|----------|-------------------------------------------------------------------------------|--------------|------|
| Isl1     | ISL1 transcription factor, LIM/homeodomain                                    | 1450723_at   | 5.97 |
| Tenm2    | teneurin transmembrane protein 2                                              | 1454424_at   | 5.9  |
| Atg7     | autophagy related 7                                                           | 1446633_at   | 5.64 |
| Brsk2    | BR serine/threonine kinase 2                                                  | 1439329_a_at | 5.62 |
| Slit3    | slit homolog 3 (Drosophila)                                                   | 1452296_at   | 5.48 |
| Mycbp2   | MYC binding protein 2                                                         | 1445340_at   | 5.48 |
| Sod1     | superoxide dismutase 1, soluble                                               | 1447761_x_at | 5.26 |
| Edn3     | endothelin 3                                                                  | 1421136_at   | 5.25 |
| Ndn      | necdin                                                                        | 1456575_at   | 4.91 |
| Tgfb2    | transforming growth factor, beta 2                                            | 1423250_a_at | 4.75 |
| Slit1    | slit homolog 1 (Drosophila)                                                   | 1425277_at   | 4.65 |
| Slitrk4  | SLIT and NTRK-like family, member 4                                           | 1437744_at   | 4.56 |
| Dscam1l  | Down syndrome cell adhesion molecule like 1                                   | 1427392_at   | 4.53 |
| Fgf8     | fibroblast growth factor 8                                                    | 1451882_a_at | 4.3  |
| Cdk5r2   | cyclin-dependent kinase 5, regulatory subunit 2 (p39)                         | 1450465_at   | 4.29 |
| Als2     | amyotrophic lateral sclerosis 2 (juvenile)                                    | 1417784_at   | 4.24 |
| Mapk8ip2 | mitogen-activated protein kinase 8 interacting protein 2                      | 1418785_at   | 4.24 |
| Clic5    | chloride intracellular channel 5                                              | 1439505_at   | 4.21 |
| Mypn     | myopalladin                                                                   | 1435813_at   | 4.19 |
| Gata3    | GATA binding protein 3                                                        | 1448886_at   | 4.08 |
| Ephb1    | Eph receptor B1                                                               | 1455188_at   | 4.08 |
| Nrcam    | neuronal cell adhesion molecule                                               | 1458833_at   | 3.96 |
| Myo3a    | myosin IIIA                                                                   | 1431983_at   | 3.93 |
| Map2     | microtubule-associated protein 2                                              | 1421327_at   | 3.79 |
| Epha10   | Eph receptor A10                                                              | 1436093_at   | 3.69 |
| Brsk2    | BR serine/threonine kinase 2                                                  | 1431826_a_at | 3.68 |
| Chrn2    | cholinergic receptor, nicotinic, beta polypeptide 2<br>(neuronal)             | 1441837_at   | 3.68 |
| Itga4    | integrin alpha 4                                                              | 1450155_at   | 3.65 |
| Robo3    | roundabout homolog 3 (Drosophila)                                             | 1436634_at   | 3.65 |
| Epha4    | Eph receptor A4                                                               | 1439757_s_at | 3.61 |
| Elav14   | ELAV (embryonic lethal, abnormal vision,<br>Drosophila)-like 4 (Hu antigen D) | 1450258_a_at | 3.61 |
| Mapk8ip2 | mitogen-activated protein kinase 8 interacting protein 2                      | 1435045_s_at | 3.57 |
| Cdk5r1   | cyclin-dependent kinase 5, regulatory subunit 1 (p35)                         | 1433451_at   | 3.5  |

|         |                                                                                        |              |        |
|---------|----------------------------------------------------------------------------------------|--------------|--------|
| Bcl11b  | B cell leukemia/lymphoma 11B                                                           | 1435227_at   | 3.49   |
| Epha4   | Eph receptor A4                                                                        | 1421929_at   | 3.46   |
| Pou4f2  | POU domain, class 4, transcription factor 2                                            | 1437588_at   | 3.42   |
| Map2    | microtubule-associated protein 2                                                       | 1434194_at   | 3.32   |
| Myo7a   | myosin VIIA                                                                            | 1421385_a_at | 3.31   |
| Etv4    | ets variant 4                                                                          | 1443381_at   | 3.3    |
| Sema3b  | sema domain, immunoglobulin domain (Ig), short basic domain, secreted, (semaphorin) 3B | 1431795_a_at | 3.13   |
| Cntnap1 | contactin associated protein-like 1                                                    | 1421580_at   | 3.13   |
| Igf2bp1 | insulin-like growth factor 2 mRNA binding protein 1                                    | 1455223_at   | 3.06   |
| Grcc10  | gene rich cluster, C10 gene                                                            | 1429782_at   | 3.02   |
| Dscam   | Down syndrome cell adhesion molecule                                                   | 1458625_at   | -3.11  |
| Clc5    | chloride intracellular channel 5                                                       | 1456873_at   | -3.49  |
| Dscaml1 | Down syndrome cell adhesion molecule like 1                                            | 1432196_a_at | -3.64  |
| Clc5    | chloride intracellular channel 5                                                       | 1431261_at   | -3.85  |
| Epha4   | Eph receptor A4                                                                        | 1456863_at   | -6.13  |
| Slitrk4 | SLIT and NTRK-like family, member 4                                                    | 1440516_at   | -6.36  |
| Ptprz1  | protein tyrosine phosphatase, receptor type Z, polypeptide 1                           | 1418690_at   | -6.47  |
| Lhx3    | LIM homeobox protein 3                                                                 | 1421753_a_at | -6.88  |
| Bcl11b  | B cell leukemia/lymphoma 11B                                                           | 1450339_a_at | -7.77  |
| Itga4   | integrin alpha 4                                                                       | 1427615_at   | -8.53  |
| Zdhhc17 | zinc finger, DHHC domain containing 17                                                 | 1447656_at   | -8.6   |
| Edn3    | endothelin 3                                                                           | 1441923_s_at | -10    |
| Cacna1a | Cacna1a calcium channel, voltage-dependent, P/Q type, alpha 1A subunit                 | 1420287_at   | -11.62 |
